# Supplementary material for: Diverse Profiles of Ricin-Cell Interactions in the Lung Following Intranasal Exposure to Ricin
Source: PubMed Central journal article supplement (PMC4663535; doi:10.3390/toxins7114817), 2015-11-17
Supplement: toxins-07-04817-s001.pdf [file toxins-07-04817-s001.pdf]

## Supplementary Information

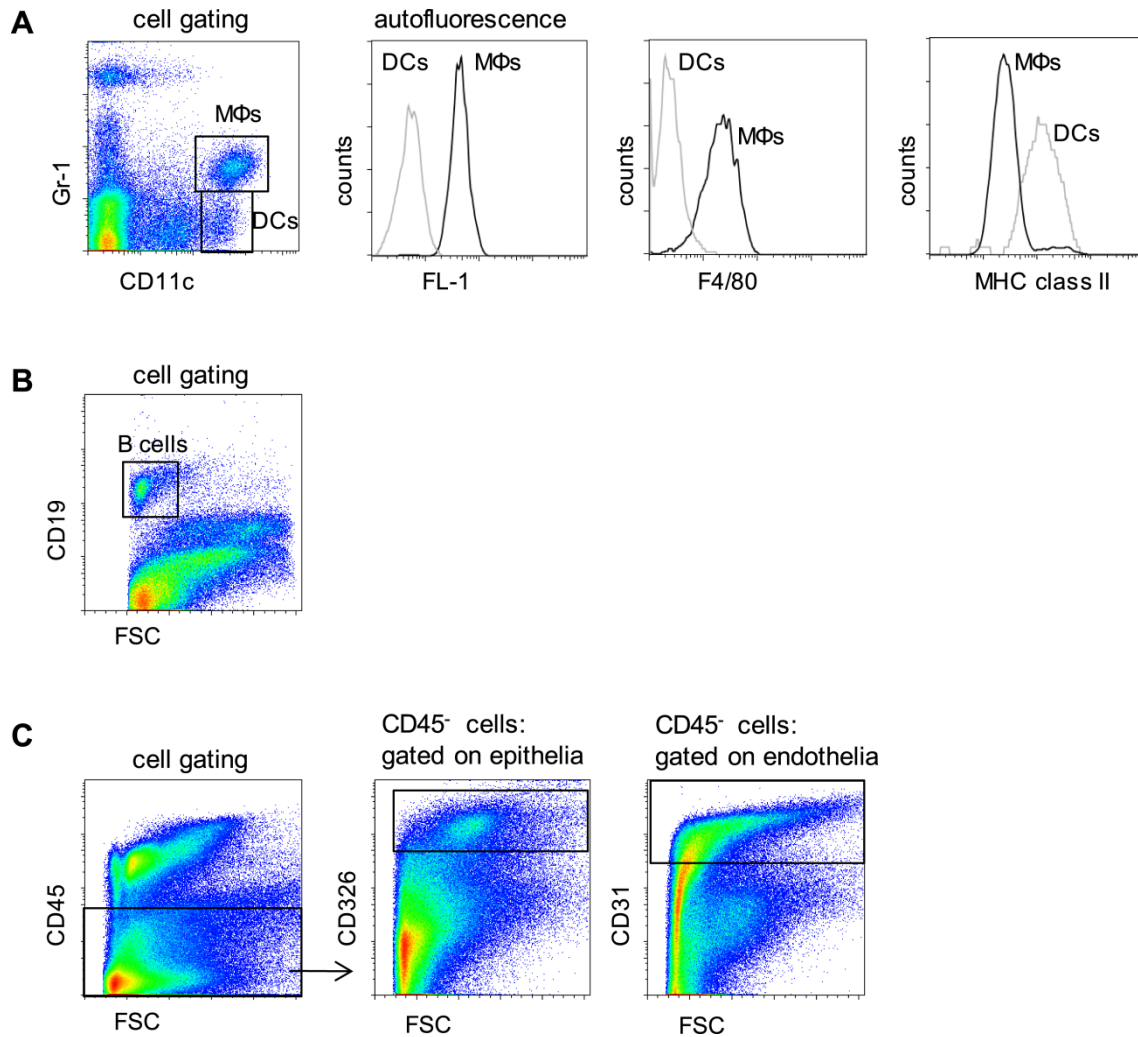

**Figure S1.** FACS analysis of cell populations in the lung. **(A)** Representative dot plot for gating alveolar MΦs (CD11c<sup>high</sup>, Gr-1<sup>int</sup>) and DCs (CD11c<sup>int</sup>, Gr-1<sup>-</sup>). Alveolar MΦs were autofluorescent as shown by FL-1 and the expressed F4/80 marker. DCs expressed higher levels of major histocompatibility complex (MHC) class II than MΦs; **(B)** Representative dot plot for gating B cells (CD19<sup>+</sup>); **(C)** Representative dot plots for gating epithelia (CD45<sup>-</sup>, CD326<sup>+</sup>) and endothelia (CD45<sup>-</sup>, CD31<sup>+</sup>).

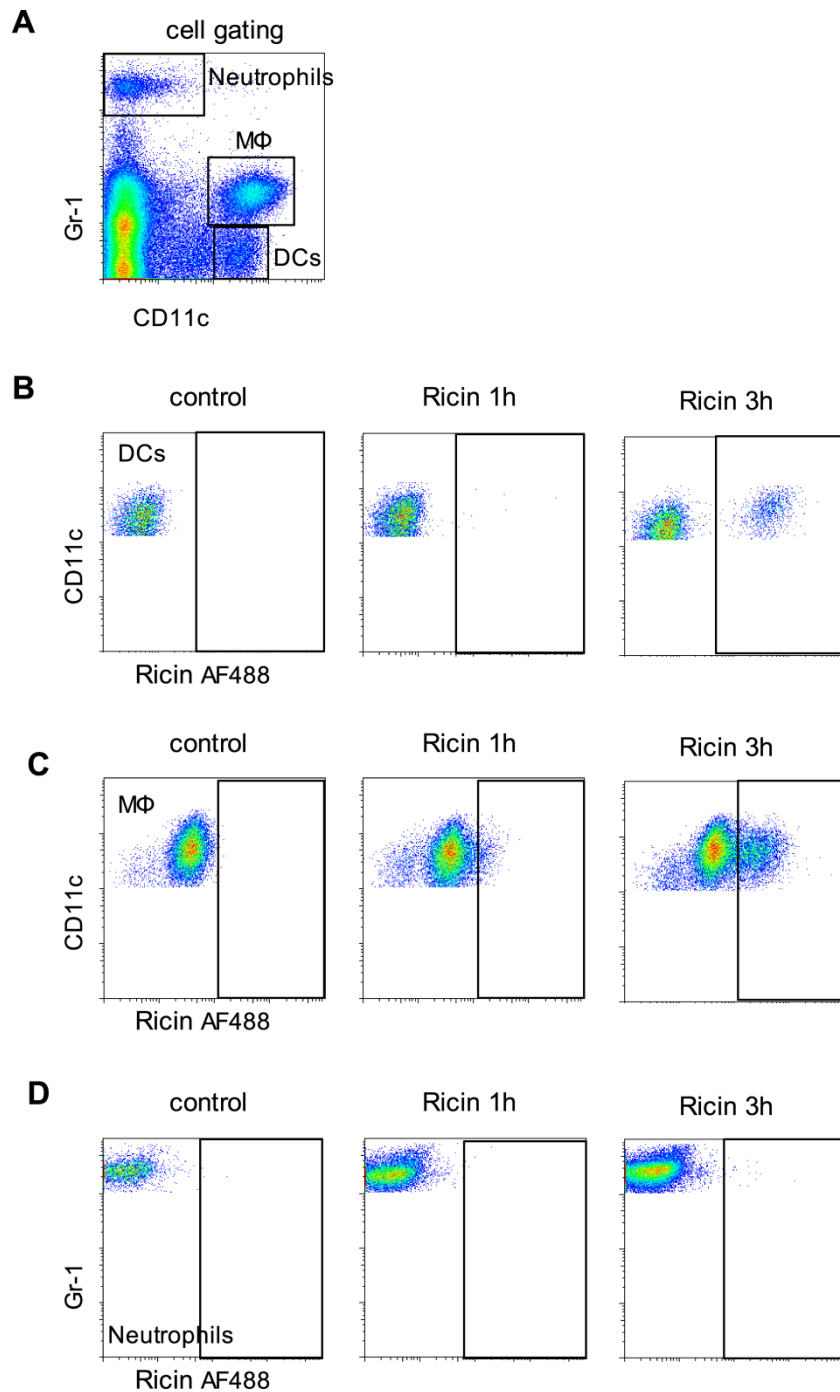

**Figure S2.** FACS analysis of early fluorescent ricin binding in cell populations in the lung. (A) Representative dot plot for gating neutrophils ( $CD11c^{-}$ ,  $Gr-1^{high}$ ), alveolar autofluorescent MΦs ( $CD11c^{high}$ ,  $Gr-1^{int}$ ) and DCs ( $CD11c^{int}$ ,  $Gr-1^{-}$ ). Lung cells isolated after 1 or 3 h from mice intranasally-exposed to ricin-AF488 were analyzed for ricin-bound DCs (B), MΦs (C) and neutrophils (D).

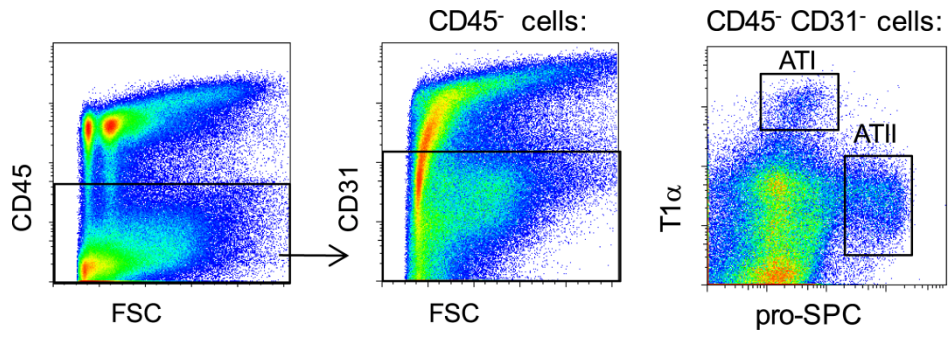

**Figure S3.** FACS analysis of lung epithelial subpopulations. ATI cells were gated as CD45<sup>-</sup>, CD31<sup>-</sup>, T1<sup>+</sup> and pro-SPC<sup>-</sup>, and ATII cells were gated as CD45<sup>-</sup>, CD31<sup>-</sup>, T1<sup>-</sup> and pro-SPC<sup>+</sup>.
